# Supplementary material for: Synthesis and Biological Evaluation of Ginsenoside Compound K Derivatives as a Novel Class of LXRα Activator
Source: MDPI journal article supplement (doi:10.3390/molecules22071232), 2017-07-24
Supplement: s1 [file s1]

## <sup>1</sup>H NMR of ginsenoside compound K derivatives

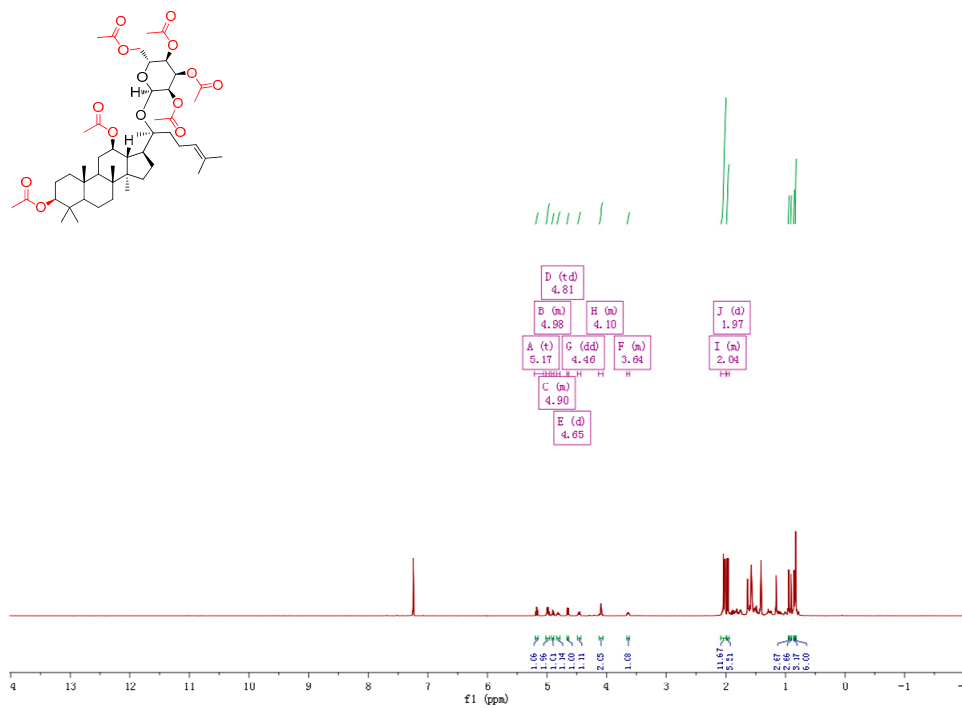

Figure 1. <sup>1</sup>H NMR of structure 1

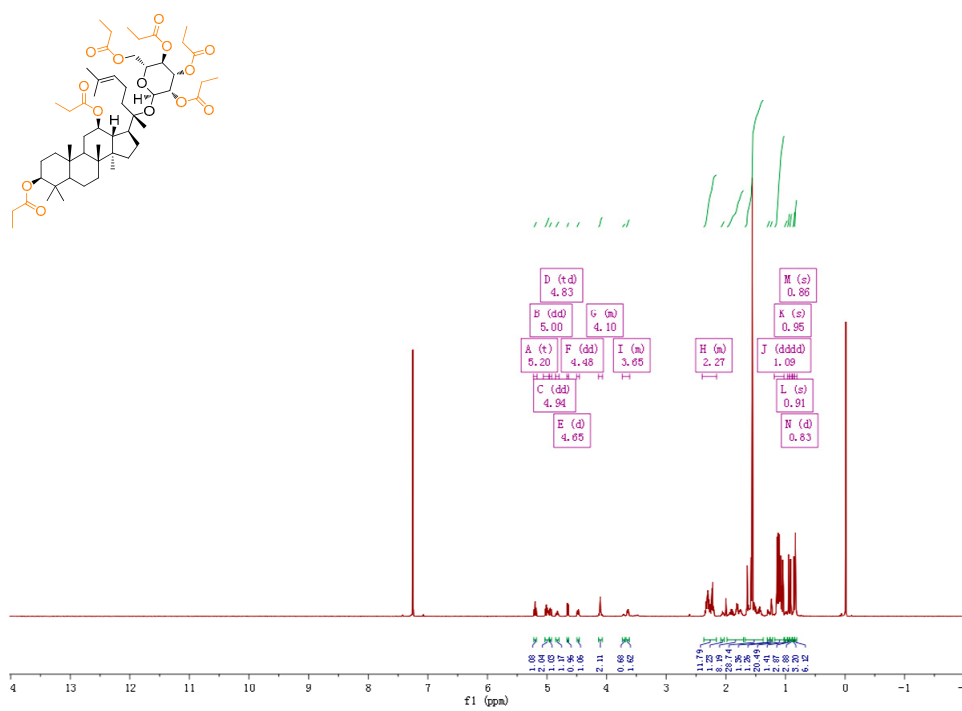

Figure 2. <sup>1</sup>H NMR of structure 2

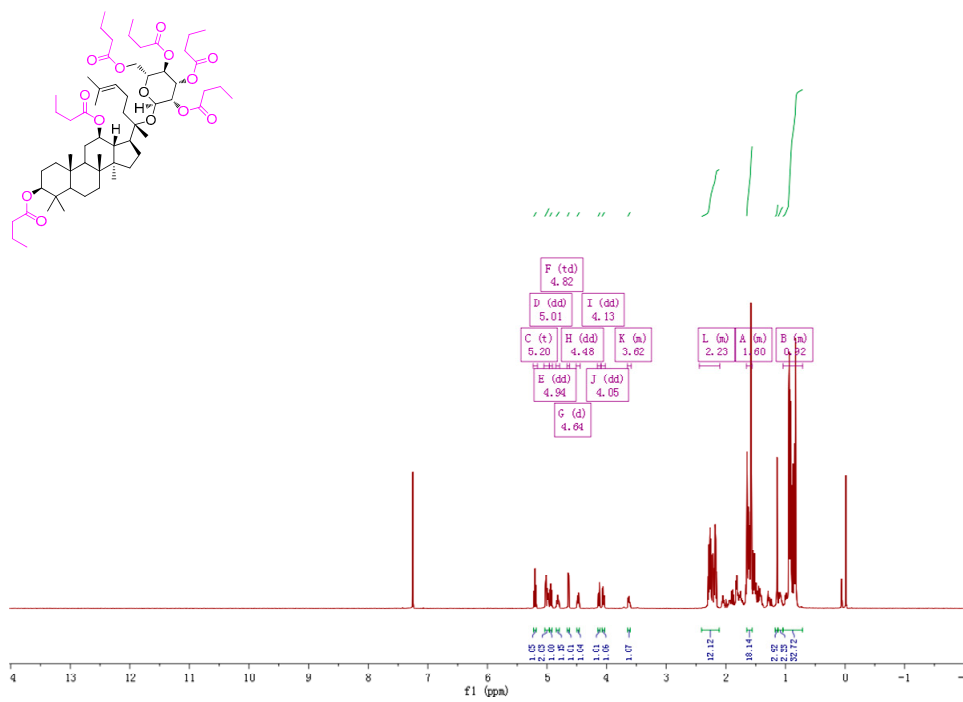

Figure 3. <sup>1</sup>H NMR of structure 3

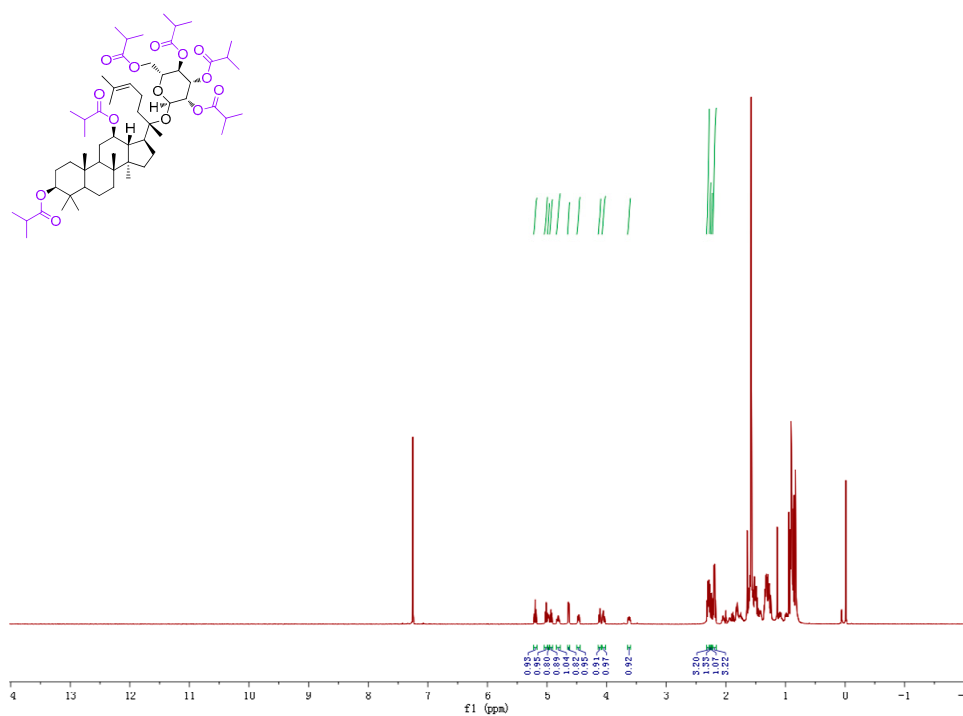

Figure 4. <sup>1</sup>H NMR of structure 4

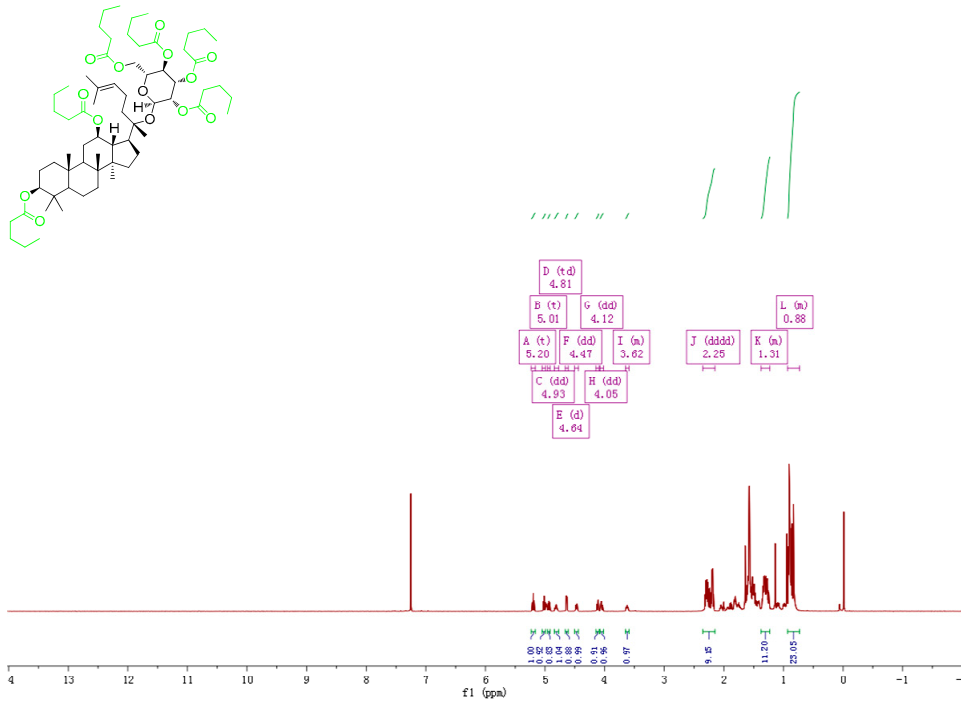

Figure 5.  $^1\text{H}$  NMR of structure 5

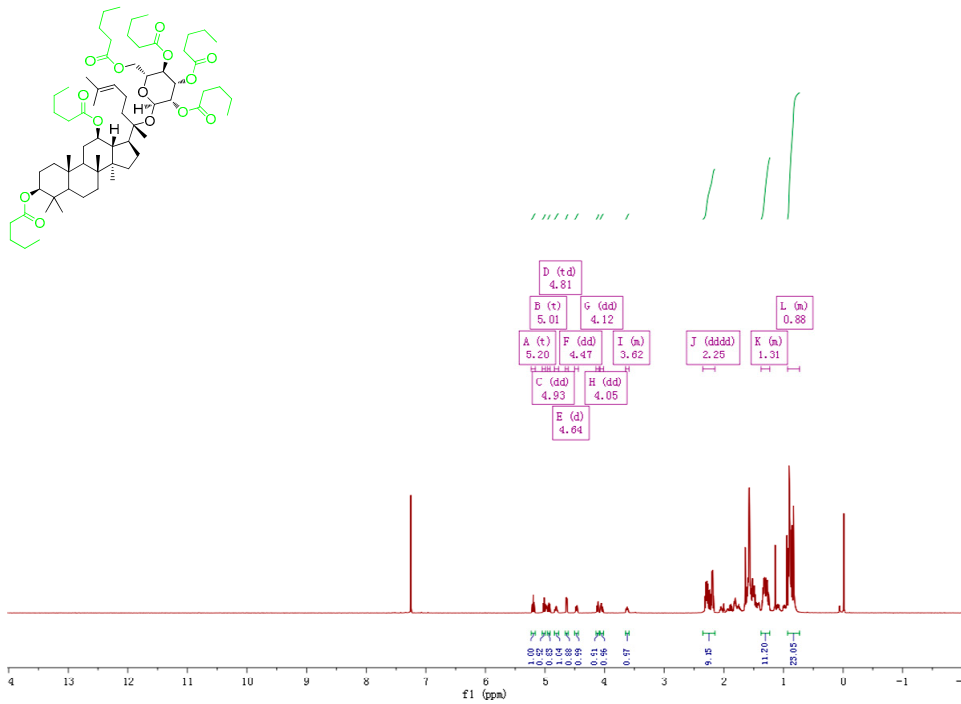

Figure 6.  $^1\text{H}$  NMR of structure 6

### <sup>13</sup>C NMR of ginsenoside compound K derivatives

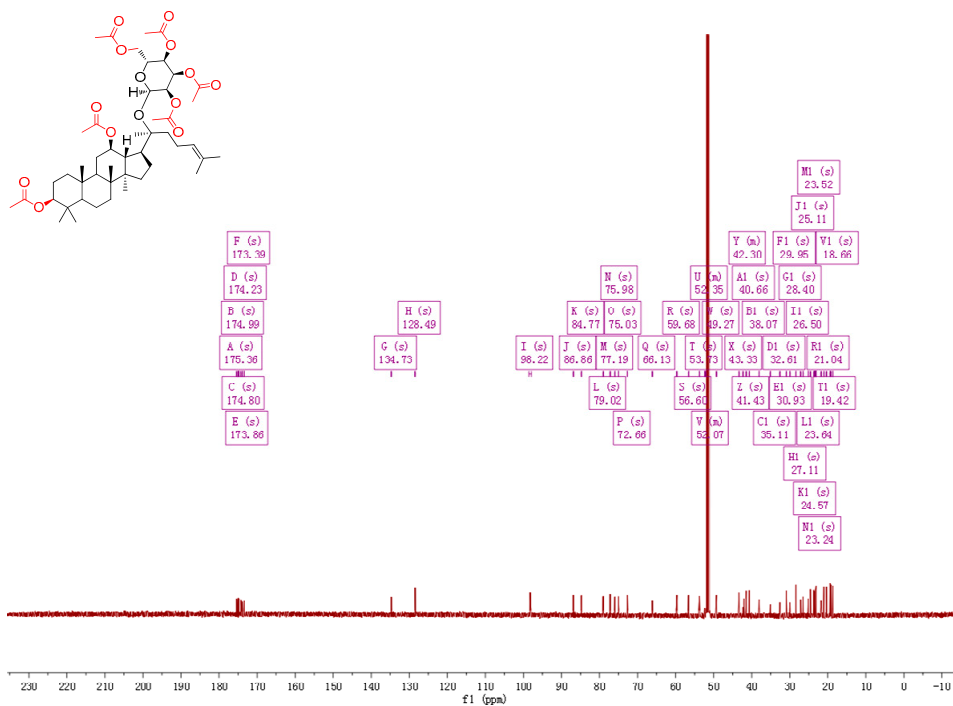

Figure 7. <sup>13</sup>C NMR of structure 1

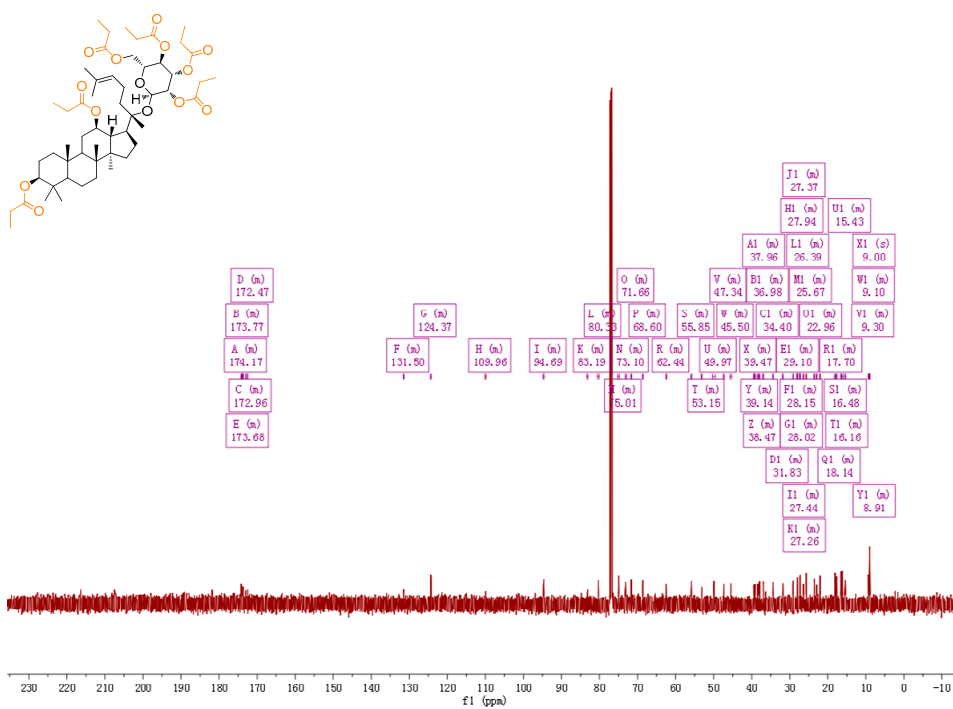

Figure 8. <sup>13</sup>C NMR of structure 2

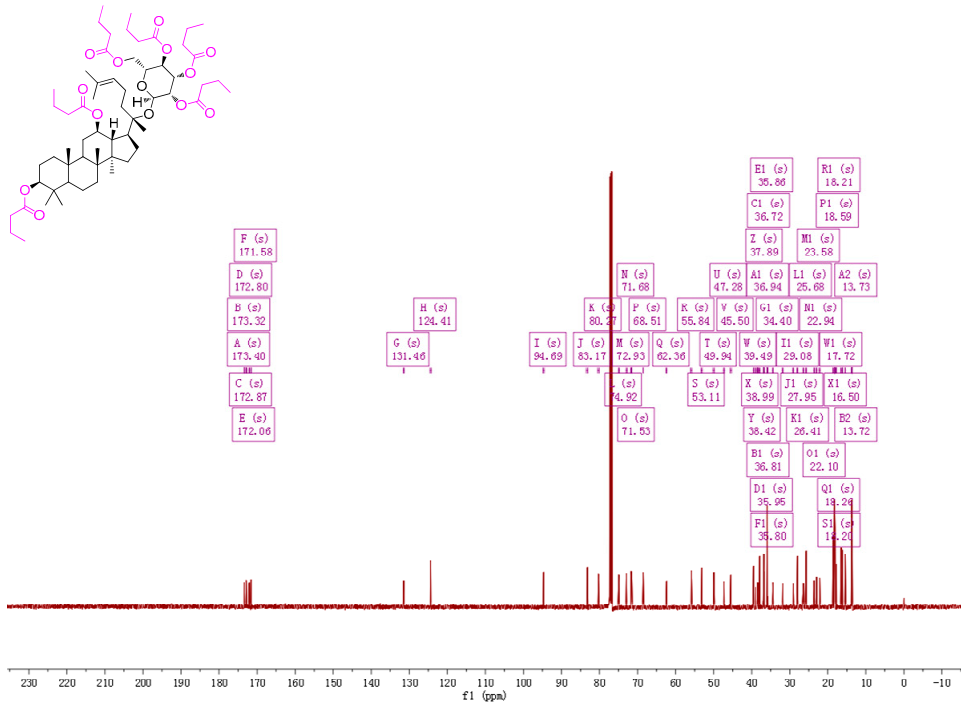

Figure 9. <sup>13</sup>C NMR of structure 3

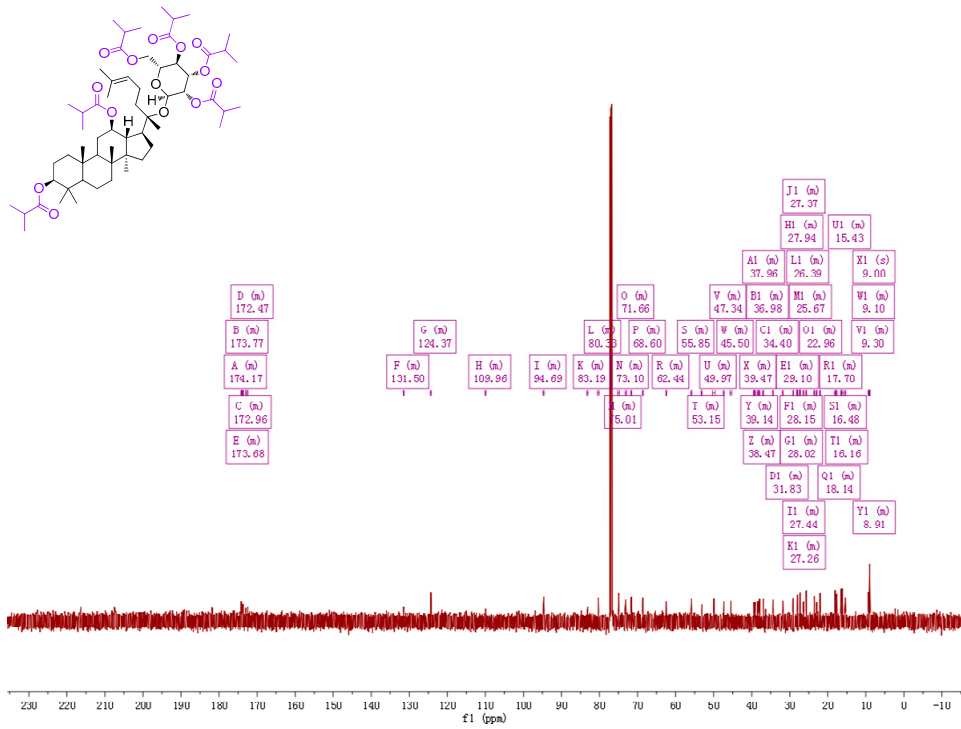

Figure 10. <sup>13</sup>C NMR of structure 4

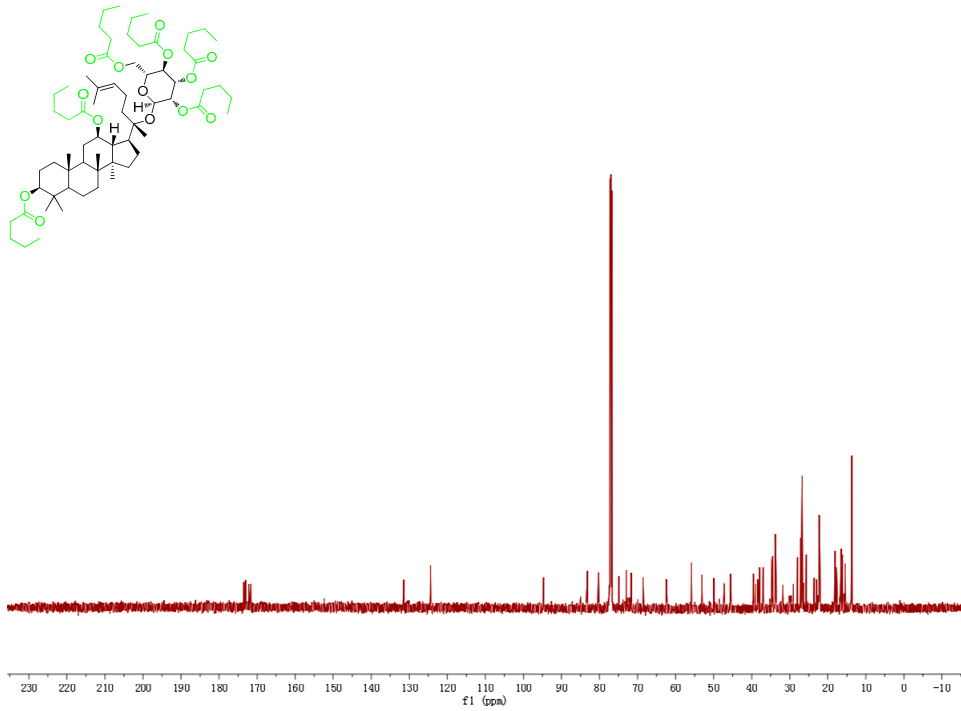

Figure 11.  $^{13}\text{C}$  NMR of structure 5

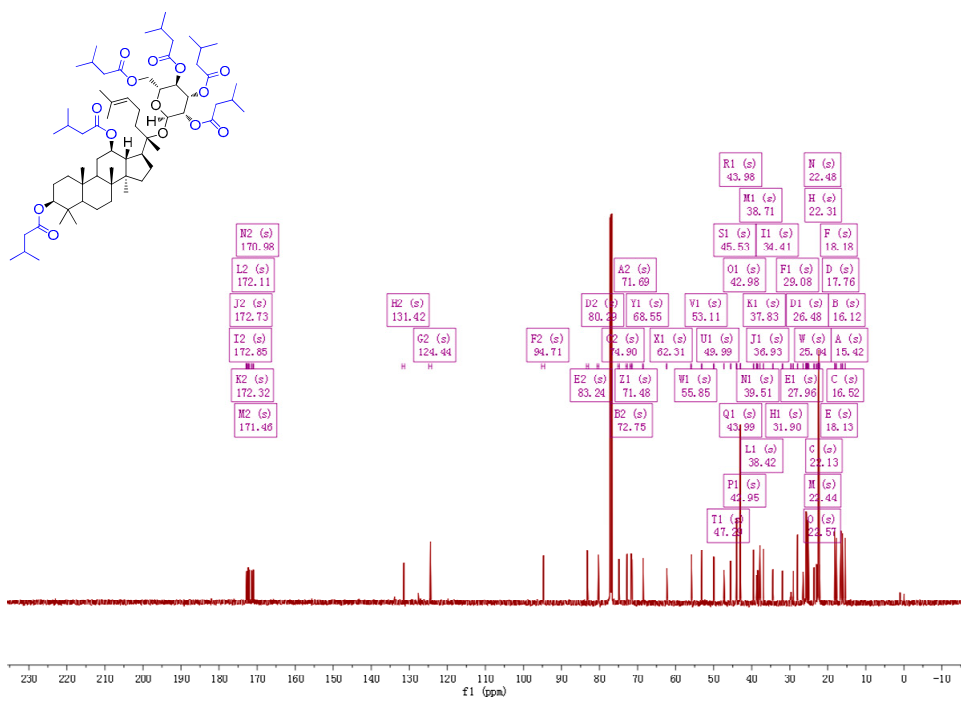

Figure 12.  $^{13}\text{C}$  NMR of structure 6
